# Supplementary material
Source: PubMed Central journal article supplement (PMC3090515)
Supplement: NIHMS262731-supplement-01.pdf [file NIHMS262731-supplement-01.pdf]

Supplemental Information

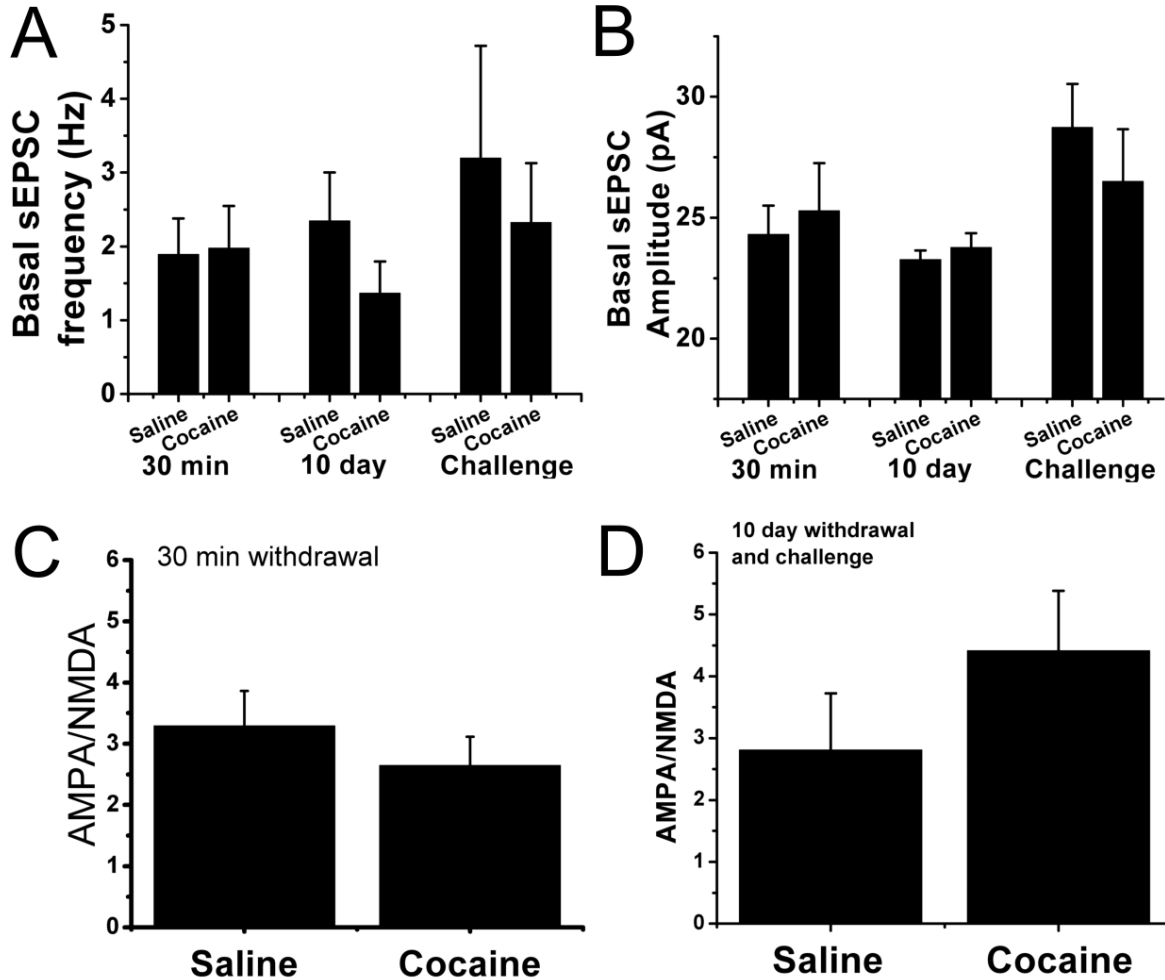

**Figure S1.** Repeated cocaine produces no gross changes in basal properties of spontaneous excitatory postsynaptic currents (sEPSCs) or AMPA/NMDA ratios.

- A) Quantification of basal frequency of sEPSCs in mice given repeated cocaine or saline in the experimental setups represented in Figures 4A, 5A, and 6A.
- B) Quantification of basal amplitude of sEPSCs in mice given repeated cocaine or saline in the experimental setups represented in Figures 4A, 5A, and 6A.
- C) Quantification of AMPA/NMDA ratio at the experimental setup represented in Figure 4A.
- D) Quantification of AMPA/NMDA ratio at the experimental setup represented in Figure 6A.
